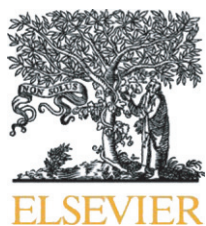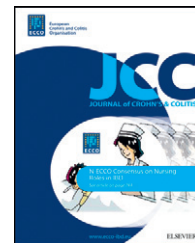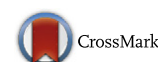

# Achievement of deep remission during scheduled maintenance therapy with TNF $\alpha$ -blocking agents in IBD

Pauliina Molander<sup>a,j,\*</sup>, Taina Sipponen<sup>b</sup>, Helena Kemppainen<sup>c</sup>,  
Airi Jussila<sup>d</sup>, Timo Blomster<sup>e</sup>, Ritva Koskela<sup>e</sup>, Markku Nissinen<sup>f</sup>,  
Henna Rautiainen<sup>g</sup>, Juha Kuisma<sup>h</sup>, Kaija-Leena Kolho<sup>i</sup>, Martti Färkkilä<sup>b,j</sup>

<sup>a</sup> Maria Helsinki City Hospital, Helsinki, Finland

<sup>b</sup> Department of Medicine, Division of Gastroenterology, Helsinki University Central Hospital, Helsinki, Finland

<sup>c</sup> Department of Medicine, Division of Gastroenterology, Turku University Central Hospital, Turku, Finland

<sup>d</sup> Department of Gastroenterology and Alimentary Tract Surgery, Tampere University Hospital, Tampere, Finland

<sup>e</sup> Department of Medicine, Division of Gastroenterology, Oulu University Central Hospital, Oulu, Finland

<sup>f</sup> Department of Medicine, Division of Gastroenterology, Helsinki University Central Hospital, Peijas Hospital, Vantaa, Finland

<sup>g</sup> Department of Medicine, Division of Gastroenterology, Helsinki University Central Hospital, Jorvi Hospital, Espoo, Finland

<sup>h</sup> Department of Medicine, Hyvinkää Hospital, Hyvinkää, Finland

<sup>i</sup> Children's Hospital, Helsinki University Central Hospital, Helsinki, Finland

<sup>j</sup> University of Helsinki, Helsinki, Finland

Received 12 June 2012; received in revised form 1 October 2012; accepted 30 October 2012

## KEYWORDS

IBD;  
Crohn's disease;  
Ulcerative colitis;  
Infliximab;  
Adalimumab;  
Mucosal healing

## Abstract

**Background and aims:** Deep remission, meaning clinical remission with mucosal healing (MH), with anti-tumor necrosis factor- $\alpha$  (TNF- $\alpha$ ) agents is a new target for therapy in inflammatory bowel disease (IBD). Our aim was to study how often patients on TNF- $\alpha$  blocking therapy actually achieve deep remission.

**Methods:** The total of 252 IBD patients retrospectively included (183 Crohn's disease (CD), 62 ulcerative colitis (CU) or 7 inflammatory bowel disease unclassified-type colitis (IBDU)) received TNF $\alpha$ -antagonists (177 infliximab, 75 adalimumab) for at least 11 months and underwent ileocolonoscopy. We reviewed endoscopic and histological findings, clinical symptoms, C-reactive protein (CRP), and fecal calprotectin (FC) levels, and data on TNF- $\alpha$  blocking therapy. Defining deep remission as no clinical symptoms with endoscopic remission (the simple endoscopic score for Crohn's disease, SES-CD 0–2 or Mayo endoscopic subscore 0–1).

**Results:** Of the 252 patients, 168 (67%) were in clinical remission and 122 (48%) in deep remission after a median of 23 months of maintenance therapy. Of the 183 CD patients, 117

\* Corresponding author at: Department of Medicine, Division of Gastroenterology, Maria Helsinki City Hospital, P.O.B. 6501, FIN-00099 Helsinki, Finland. Tel.: +358 50 5252872; fax: +358 9 31034347.

E-mail address: [pauliina.molander@welho.com](mailto:pauliina.molander@welho.com) (P. Molander).

(64%) reached clinical remission and 79 (43%) deep remission. Of the UC patients, 52 (75%) were in clinical remission and 43 (62%) in deep remission. The majority of patients in deep remission ( $n=99$ , 81%) also had histologically inactive disease. Both median CRP and FC levels were significantly lower in patients with deep remission.

**Conclusion:** Reassuringly, half of the IBD patients on the TNF $\alpha$ -blocking maintenance therapy achieved deep remission. The majority of patients in deep remission also achieved histological remission.

© 2012 European Crohn's and Colitis Organisation. Published by Elsevier B.V. All rights reserved.

## 1. Introduction

Inflammatory bowel diseases (IBD), Crohn's disease (CD), ulcerative colitis (UC) and inflammatory bowel disease unclassified-type colitis (IBDU) are chronic inflammatory diseases characterized by remission and exacerbations. For decades, treatment goals for IBD have been to achieve clinical response or remission and normalization of laboratory parameters.<sup>1,2</sup> Recently, therapeutic targets for treatment of IBD have included mucosal healing (MH) and prevention of extraintestinal complications.<sup>2–4</sup> MH has been defined by the International Organization of IBD (IOIBD) as the absence of friability, blood, erosions, and ulcers in all visualized segments of the mucosa.<sup>5</sup> Endoscopic assessment of response to therapy has only seldom been adaptable for routine clinical practice. Promising new biomarkers such as fecal calprotectin (FC) correlate closely with endoscopic and histological grading of disease activity in both UC and CD.<sup>6–8</sup> FC has been a useful predictor of MH, serving thus as a good noninvasive surrogate marker of MH.<sup>6,9–11</sup>

Like the treatment targets for IBD, the management of IBD has also changed, aiming more aggressively to MH. The anti-tumor necrosis factor- $\alpha$  (TNF- $\alpha$ ) agents infliximab and adalimumab are the most effective therapies in IBD for induction of MH. In ACCENT I (the luminal Crohn's disease trial) infliximab maintenance therapy every 8 weeks was associated with long-term MH in about half of the CD patients undergoing endoscopy.<sup>12</sup> The EXTEND trial, a randomized placebo-controlled study of adalimumab induction and maintenance therapy in patients with moderate to severe ileocolonic CD, has recently shown complete MH occurring significantly more often in adalimumab-treated CD patients than in controls at week 52.<sup>13</sup> In UC, a randomized, double-blinded, placebo-controlled ACT1 trial demonstrated MH occurring significantly more often in the infliximab than in the placebo group.<sup>14</sup> In UC, the efficacy of adalimumab in inducing MH in a double-blind randomized controlled trial has been much less convincing.<sup>15</sup> In UC, early mucosal healing with infliximab has been associated with a lower risk for colectomy.<sup>16</sup> In sum MH appears to be an important therapeutic endpoint in both CD and UC and a good predictive marker for disease outcome.

In clinical practice, TNF- $\alpha$  blocking therapy may be withdrawn for several reasons such as primary nonresponsiveness, fear of long-term side-effects, or concerns about pregnancy and about cost. The Groupe d'Etudes Therapeutiques des Affections Inflammatoires Digestives (GETAID) studied the risk for relapse following withdrawal of infliximab therapy in CD patients with long-standing remission. They showed that among CD

patients in stable remission at the time of withdrawal of infliximab therapy, up to half relapsed within one or two years. Importantly, that study showed that patients at low risk for relapse could be determined by use of a combination of clinical and biological markers, and in those relapsing, re-treatment with infliximab was effective and well tolerated.<sup>17</sup>

Although TNF- $\alpha$  blocking therapy has been used in clinical practice for over a decade, only little data have appeared on the prevalence of concomitant clinical remission and MH during maintenance therapy with anti-TNF- $\alpha$  agents. Recently, in CD the term deep remission has been applied to patients on immunomodulators or TNF- $\alpha$  blocking therapy or both who have no clinical symptoms and no objective signs of inflammation (defined as Crohn's disease activity index [CDAI<150] and endoscopic remission).<sup>13</sup> In UC or IBDU, no such definition exists.

Our aim was to study how often deep remission can actually be achieved in IBD patients on TNF- $\alpha$  blocking therapy in everyday clinical practice. In addition, we evaluated the achievement of histological remission.

## 2. Materials and methods

### 2.1. Patients and treatment

Eight gastroenterological units in various parts of Finland participated (Helsinki (2), Espoo, Vantaa, Hyvinkää, Tampere, Turku, and Oulu). Data were collected retrospectively for all UC, CD, and IBDU patients treated for at least 11 months with a scheduled TNF $\alpha$ -blocking therapy and undergoing ileocolonoscopy during 2010 and 2011. The total was 252 patients with IBD (183 patients with CD, 62 with UC, and 7 with IBDU). Because of its small size, the subgroup IBDU with 7 is herein included in the UC group. The majority (145, 79%) of the patients with CD were treated for luminal CD, and 37 (20%) patients for fistulizing CD. In two patients with pediatric CD onset, the main indication for TNF $\alpha$ -blocking therapy had been delayed growth. Of UC or IBDU patients, 31 (45%) had a steroid-refractory disease and 38 (55%) had steroid-dependent disease.

### 2.2. Clinical and endoscopic assessment of disease activity

Clinical disease activity was assessed by the physicians' global assessment (PGA) scores: 0 for nonsymptomatic patients and 1 for patients with gastrointestinal symptoms indicating with active IBD. Scoring of endoscopic findings took place in participating units as routine clinical practice. Endoscopic

findings were scored according to the simple endoscopic score for Crohn's disease (SES-CD),<sup>18</sup> and in UC according to the Mayo endoscopic score.<sup>19</sup> An SES-CD 0 to 2 was defined as remission, 3 to 6 as mildly active disease, 7 to 15 as moderately active disease, and  $\geq 16$  as severely active disease.<sup>20</sup> For the Mayo endoscopic subscore, endoscopic findings were scored as normal (0), mild (1), moderate (2), or severe (3); a subscore of 0 to 1 meant remission and a subscore of  $\geq 2$  active disease.<sup>21</sup> In this study we defined deep remission as no clinical symptoms (PGA=0) with concomitant endoscopic remission (SES-CD 0–2 or Mayo endoscopic subscore 0–1).

### 2.3. Histological assessment of disease activity

During the ileocolonoscopy, random biopsy specimens were taken from the ileum, the right, transverse, and left colon, and the rectum. We graded histological findings according to the most severely diseased areas: 0=normal and 1=active inflammation.

### 2.4. Laboratory measurements

Data on FC concentrations and C-reactive protein (CRP) values were those measured at the time of the ileocolonoscopies. The values considered as normal for FC were  $<100 \mu\text{g/g}$ <sup>22</sup> and  $<3 \text{ mg/l}$  for CRP.

### 2.5. Statistical analysis

For data analyses we used the PASW (Predictive Analytics Software) Statistics 18 for Windows software (IBM Company, Chicago, IL, USA). The Mann–Whitney U-test served to test differences between independent variables. The Chi square test was used to find out differences between categorical variables. Significance was set at  $p < 0.05$ .

### 2.6. Ethical statement

Because this study was a retrospective review of patients' medical records, no application for ethics committee was needed. Research study permission number 195/2009 was received from the Department of Medicine, Helsinki University Central Hospital.

## 3. Results

Patient characteristics are listed in Table 1. Of 252 patients, 177 (70%) received infliximab (CD  $n=109$ , UC  $n=68$ ) and 75 (30%) adalimumab (CD  $n=74$ , UC  $n=1$ ). At the time of ileocolonoscopy, 183 (73%) patient received combination therapy (Table 1). The median time to treat was 23 months (range 11–147) from induction of TNF $\alpha$ -blocking therapy to ileocolonoscopy. Table 2 shows endoscopic activity indices, FC and CRP levels at ileocolonoscopy.

### 3.1. Deep remission

At ileocolonoscopy, 168 (67%) patients of 252 were in clinical remission and 122 (48%) in deep remission. Of 183 CD patients, 116 (63%) achieved clinical remission and 79 (43%)

**Table 1** Patient characteristics.

| Characteristic                   | Crohn's disease (n=183) | Ulcerative colitis (n=62) | Inflammatory bowel disease unclassified type colitis (n=7) |
|----------------------------------|-------------------------|---------------------------|------------------------------------------------------------|
| Age at onset (median, range)     | 21 (2–57)               | 25 (8–72)                 | 18 (17–65)                                                 |
| Age at induction (median, range) | 32 (12–69)              | 31 (13–75)                | 27 (22–68)                                                 |
| Gender (female/male)             | 85/98                   | 25/37                     | 2/5                                                        |
| Disease duration (median, range) | 8 (0–33)                | 5 (0–34)                  | 5 (0–9)                                                    |
| Disease behavior (Mb Crohn)      |                         |                           |                                                            |
| Inflammatory (B1)                | 86                      |                           |                                                            |
| Stricturing (B2)                 | 45                      |                           |                                                            |
| Penetrating (B3)                 | 20                      |                           |                                                            |
| B1 $\pm$ perianal disease        | 11                      |                           |                                                            |
| B2 $\pm$ perianal disease        | 13                      |                           |                                                            |
| B3 $\pm$ perianal disease        | 8                       |                           |                                                            |
| Disease location                 |                         |                           |                                                            |
| Ileum (L1)                       | 14                      |                           |                                                            |
| Colon (L2)                       | 55                      |                           |                                                            |
|                                  |                         | Proctitis 0               |                                                            |
|                                  |                         | Left colon 17             |                                                            |
|                                  |                         | Extensive colitis 45      | 7                                                          |
| Ileocolon (L3)                   | 106                     |                           |                                                            |
| L1 + upper GI                    | 2                       |                           |                                                            |
| L2 + upper GI                    | 2                       |                           |                                                            |
| L3 + upper GI                    | 4                       |                           |                                                            |
| TNF $\alpha$ -blocking therapy   |                         |                           |                                                            |
| Infliximab                       | 109                     | 61                        | 7                                                          |
| Adalimumab                       | 74                      | 1                         |                                                            |
| Concomitant immunomodulators     |                         |                           |                                                            |
| Azathioprine                     | 93 (51%)                | 41 (66%)                  | 6 (86%)                                                    |
| 6-mercaptopurine                 | 15 (8%)                 | 10 (10%)                  |                                                            |
| Methotrexate                     | 18 (10%)                | 6 (6%)                    |                                                            |

deep remission. Of UC patients, 52 (75%) achieved clinical remission and 43 (62%) deep remission. The clinical remission rate in CD ranged from 50% to 85% and in UC from 33% to 100%, and the deep remission rate in CD ranged from 25% to 71% and in UC from 33% to 100% among clinics. No significant difference appeared as to achieving clinical remission between CD and UC patients ( $p=0.072$ ). UC patients achieved deep remission significantly more often than did CD patients ( $p=0.007$ ).

There emerged a significant difference in CRP level between those 122 in deep remission (median  $<3 \text{ mg/l}$ , range  $<3$  to 103) and those 130 with clinically or endoscopically active disease (median  $3 \text{ mg/l}$ , range 0–83,  $p < 0.0001$ ).

**Table 2** Endoscopic activity indices, fecal calprotectin and CRP levels at time of ileocolonoscopy.

|                               | All patients<br>(n = 252) | CD patients in<br>deep remission<br>(n = 79) | CD patients with<br>active disease<br>(n = 104) | p value   | UC patients in<br>deep remission<br>(n = 43) | UC patients with<br>active disease<br>(n = 26) | p value   |
|-------------------------------|---------------------------|----------------------------------------------|-------------------------------------------------|-----------|----------------------------------------------|------------------------------------------------|-----------|
| SES-CD                        | 2 (0–24, n = 183) \       | 0 (0–2, n = 79)                              | 5 (0–24, n = 104)                               | p < 0.001 | 0 (0–1, n = 43)                              | 2 (1–3, n = 26)                                | p < 0.001 |
| Endoscopic<br>Mayo subscore \ | 0 (0–3, n = 69)           |                                              |                                                 |           |                                              |                                                |           |
| Fecal<br>calprotectin         | 78 (1–4190, n = 163)      | 54 (6–722, n = 40)                           | 251 (6–2534, n = 67)                            | p < 0.001 | 50 (1–500, n = 39)                           | 519 (13–4190, n = 18)                          | p < 0.001 |
| CRP                           | < 3 (0–103, n = 252)      | < 3 (1–103, n = 79)                          | 3 (0–83, n = 67)                                | p < 0.001 | 3 (0–32, n = 26)                             | < 3 (0–24, n = 43)                             | p = 0.001 |

Values presented as median (range).

CD, Crohn's disease; UC, ulcerative colitis; SES-CD, simple endoscopic score for Crohn's disease; CRP, C-reactive protein.

In total, 140 patients had normal CRP levels (< 3 mg/l). In this group, 94 (67%) were also in deep remission. FC measurements were available for 163 patients. Median FC level was significantly lower for the 79 in deep remission compared to the 84 others (50  $\mu$ g/g, range 1–722 vs. 288  $\mu$ g/g, range 6–4190,  $p < 0.0001$ ). FC was normal (< 100  $\mu$ g/g) in 88 patients. In deep remission, 63 (72%) patients had normal FC levels, but in the active disease group, FC was normal only in 16 (21%) ( $p < 0.0001$ ).

Of patients in deep remission 51% (n = 93) received combination therapy (azathioprine n = 71, 6-mercaptopurine n = 13, methotrexate n = 9). In infliximab group 79% were on combination therapy (azathioprine n = 109, 6-mercaptopurine n = 17, methotrexate n = 14) and in adalimumab group 57% (azathioprine n = 31, 6-mercaptopurine n = 4, methotrexate n = 8). When comparing combination therapy and monotherapy in inducing deep remission, no significant differences were found (all patients  $p = 0.214$ , CD group  $p = 0.845$ , UC group  $p = 0.107$ ). Of CD patients 46% (50 of 109) in the infliximab group and 39% (29 of 74) in the adalimumab group achieved deep remission. On the contrary, of UC patients receiving infliximab, up to 63% (43 of 68) achieved deep remission. The study population being heterogeneous, no direct comparison between the two regimens could be made.

After the ileocolonoscopy, based on clinical judgment, for 43% (53 of 122) among patients in deep remission, TNF $\alpha$ -blocking therapy was withdrawn. In all these 53 patients, discontinuation of TNF $\alpha$ -blocking therapies was tried for the first time. For the other 69 patients (57%), TNF $\alpha$ -blocking therapy was continued for various reasons (Table 3).

### 3.2. Histological remission

Of the 122 patients in deep remission, 99 (81%) also had histologically inactive disease (39% of all patients). Of all CD patients in deep remission, 75% were also in histological remission, whereas in UC, the rate was 93% ( $p = 0.001$ ). Concomitant histological remission in CD patients with deep remission occurred in 59 (32%) patients. Of UC patients, 40 (58%) were in clinical, endoscopic, and histological remission. In the infliximab group, 36% (39 of 109) CD patients and 59% (36 of 61) UC patients, and in the adalimumab group 27% (20/74) of CD patients achieved clinical, endoscopic, and histological remission.

## 4. Discussion

This study demonstrates that during scheduled TNF $\alpha$ -blocking therapy in everyday clinical practice, 43% of CD patients and 62% of UC patients can achieve deep remission. Furthermore, of patients on scheduled TNF $\alpha$ -blocking therapy, 39% achieved concomitant clinical, endoscopic, and histological remission. To the best of our knowledge, this is the first study to demonstrate the achievement of clinical and deep remission rates based on nationwide data on the effect of TNF $\alpha$ -blocking therapy in everyday clinical practice judged by clinical symptoms and endoscopic findings providing important information for the use of TNF $\alpha$ -blocking agents.

We earlier demonstrated that after one year of scheduled maintenance therapy, two-thirds of endoscopic anti-TNF induction responders could be in endoscopic remission.<sup>23</sup>



**Table 3** Reasons for continuing TNF $\alpha$ -blocking therapy among our patients in deep remission.

|                                | n=69 |
|--------------------------------|------|
| Retreatment                    | 19   |
| Concomitant rheumatoid disease | 4    |
| Only effective medication      | 15   |
| High fecal calprotectin level  | 6    |
| History of severe disease      | 19   |
| Fistulating disease            | 6    |

The CHARM (Crohn's disease trial of the fully Human antibody Adalimumab for Remission Maintenance) study of adalimumab demonstrated a steroid-free clinical remission rate at week 56 for 29% of the patients, and also fewer hospitalizations and surgery.<sup>24</sup> That study lacks endoscopic data. According to the EXTEND trial, deep remission, defined as a combination of clinical remission (CDAI < 150) and complete MH, was achievable in some 19% of patients by week 52.<sup>13</sup> Compared to adalimumab studies, the ACCENT 1 endoscopic substudy demonstrated a higher MH rate in patients on scheduled infliximab therapy at 54 weeks.<sup>12</sup> Lichtenstein et al.<sup>25,26</sup> demonstrated that patients achieving MH on maintenance therapy with infliximab, experienced fewer hospitalizations and surgery and a better quality of life. Moreover, Schnitzler et al.<sup>27</sup> showed in a large cohort study that in patients with scheduled infliximab treatment, MH was associated with fewer complications and better long-term outcome. The SONIC (Study Of biologic and Immunomodulator Naïve Patients In Crohn's Disease) study showed a steroid-free clinical remission rate at week 26 of 44%.<sup>28</sup> Baert et al.<sup>29</sup> demonstrated that complete MH can lead to significantly higher steroid-free remission rates in patients with early-stage CD for as long as 4 years after start of therapy. In UC, the data on long-term outcome of TNF $\alpha$ -blocking therapy is based mainly on the ACT 1 trial. Scheduled maintenance therapy with infliximab 5 mg/kg resulted in MH in about 46% of patients by week 54.<sup>14</sup> The results of our trial resemble those described earlier. In CD, up to 46% in the infliximab group and 39% in the adalimumab group achieved deep remission. In UC, up to 63% of patients on infliximab maintenance therapy were in deep remission at the time of the ileocolonoscopy. The clinical remission rates were higher. In the infliximab group, 66% CD patients and 77% UC-patients achieved clinical remission, whereas in the adalimumab group, 60% CD patients achieved clinical remission. The data whether adalimumab-patients were naïve to biological therapies were unfortunately not available.

British guidelines for management of IBD in adults recommend an attempt at withdrawal from therapy for all patients in stable clinical remission.<sup>30</sup> In our study, after ileocolonoscopy, a total of 43% patients discontinued TNF $\alpha$ -blocking therapy in deep remission. The GETAID group's study showed that even in remission, defined as CDAI  $\leq$  150, relapse rate after withdrawing TNF $\alpha$ -blocking therapy was up to 50% in 1–2 years.<sup>17</sup> A. Molazahi et al.<sup>31</sup> demonstrated in their study published this far only as an abstract that up to 24% of their patients in CD and 30% of patients in UC stopped the medication during steroid-free remission. Their remission rates were 61% in CD and 75% in UC at one year after discontinuation of the TNF $\alpha$ -blocking therapy, and were 50% in all patients at a respective median of

680 and 1334 days. For CD patients on infliximab monotherapy, the factors associated with a high probability of relapse after stopping infliximab are short remission, endoscopically active disease, high markers of inflammation (S-CRP or platelet count), inadequate infliximab trough levels, and earlier intestinal operations.<sup>32</sup> In our study, discontinuation of TNF $\alpha$ -blocking therapy was no option in about half of the patients in deep remission, either because of a failed earlier discontinuation attempt, history of very severe disease, or no other effective medication to maintain remission. More studies are necessary to clarify the options of discontinuation of the TNF $\alpha$ -blocking therapy, before we can clearly determine in whom TNF $\alpha$ -blocking therapy can be safely stopped.

Our study has several limitations. The patient group was heterogeneous, with both CD and UC patients included regardless of localization, behavior, or duration of disease. The induction doses of both infliximab and adalimumab varied, especially at the beginning of the study period, due to local variation in protocols. We included only patients who had responded to TNF-blocking therapy sufficiently to continue with scheduled maintenance for at least 11 months. This may overestimate the efficacy of biological therapies due to endoscopy-based case selection. Furthermore, the study population included only those maintenance therapy patients that underwent ileocolonoscopy during the study period. As we had gathered our data retrospectively, clinical disease activity was assessed by the PGA rather than being based on any validated score. Finally, the endoscopic scoring was done by several experienced endoscopists, making some interobserver variability in the scoring system possible. Despite these limitations, we believe that this study reflects well the real-life situation in clinical practice.

In conclusion, deep remission may be achievable in roughly half of IBD patients on TNF $\alpha$ -blocking maintenance therapy. A considerable number of our patients had concomitant histologically inactive disease. Only for about half of our patients was discontinuation of TNF-blocking medication considered reasonable after achievement of deep remission.

## Conflict of interest

The authors declared no financial conflict of interest.

## Acknowledgments

We thank study nurse Pirkko Tuukkala for her excellent assistance. The preparation of this paper was funded in part by a University of Helsinki grant (EVO grant), a grant from the Finnish Cultural Foundation, and a grant from the Mary and George C. Ehrnrooth Foundation.

## References

1. Kornbluth A, Sachar DB. Ulcerative colitis practice guidelines in adults: American College of Gastroenterology, Practice Parameters Committee. *Am J Gastroenterol* 2010;**105**: 501–23.
2. Lichtenstein GR, Hanauer SB, Sandborn WJ. Management of Crohn's disease in adults. *Am J Gastroenterol* 2009;**104**:465–83.

3. Rutgeerts P, Vermeire S, Van Assche G. Mucosal healing in inflammatory bowel disease: impossible ideal or therapeutic target? *Gut* 2007;**56**:453–5.
4. Froslic KF, Jahnsen J, Moum BA, Vatn MH. Mucosal healing in inflammatory bowel disease: results from a Norwegian population-based cohort. *Gastroenterology* 2007;**133**:412–22.
5. Lindgren SC, Flood LM, Kilander AF, Löfberg R, Persson TB, Sjö Dahl RI. Early predictors of glucocorticosteroid treatment failure in severe and moderately severe attacks of ulcerative colitis. *Eur J Gastroenterol Hepatol* 1998;**10**:831–5.
6. Tibble JA, Sigthorsson G, Bridger S, Fagerhol MK, Bjarnason I. Surrogate markers of intestinal inflammation are predictive of relapse in patients with inflammatory bowel disease. *Gastroenterology* 2000;**119**:15–22.
7. Sipponen T, Kärkkäinen P, Savilahti E, Kolho KL, Nuutinen H, Turunen U, et al. Correlation of faecal calprotectin and lactoferrin with an endoscopic score for Crohn's disease and histological findings. *Aliment Pharmacol Ther* 2008;**28**:1221–9.
8. Sipponen T, Savilahti E, Kolho KL, Nuutinen H, Turunen U, Färkkilä M. Crohn's disease activity assessed by fecal calprotectin and lactoferrin: correlation with Crohn's disease activity index and endoscopic findings. *Inflamm Bowel Dis* 2008;**14**:40–6.
9. Røseth AG, Aadland E, Grzyb K. Normalization of faecal calprotectin: a predictor of mucosal healing in patients with inflammatory bowel disease. *Scand J Gastroenterol* 2004;**39**:1017–20.
10. Sipponen T, Kärkkäinen P, Savilahti E, Kolho KL, Nuutinen H, Turunen U, et al. Fecal calprotectin, lactoferrin and endoscopic disease activity in monitoring anti-TNF- $\alpha$  therapy for Crohn's disease. *Inflamm Bowel Dis* 2008;**14**:1392–8.
11. Costa F, Mumolo MG, Ceccarelli L, Bellini M, Romano MR, Sterpi C, et al. Calprotectin is a stronger predictive marker of relapse in ulcerative colitis than in Crohn's disease. *Gut* 2005;**54**:364–8.
12. Rutgeerts P, Diamond RH, Bala M, Olson A, Lichtenstein GR, Bao W, et al. Scheduled maintenance treatment with infliximab is superior to episodic treatment for the healing of mucosal ulceration associated with Crohn's disease. *Gastrointest Endosc* 2006;**63**:433–42.
13. Rutgeerts P, van Assche G, Sandborn J, Wolf D, Geboes K, Colombel JF, et al. Adalimumab induces and maintains mucosal healing in patients with Crohn's disease: data from the EXTEND trial. *Gastroenterology* 2012;**142**:1102–11.
14. Rutgeerts P, Sandborn WJ, Feagan BG, Reinisch W, Olson A, Johanns J, et al. Infliximab for induction and maintenance therapy for ulcerative colitis. *N Engl J Med* 2005;**353**:2462–76.
15. Sandborn WJ, van Assche G, Reinisch W, Colombel JF, D'Haens G, Wolf DC, et al. Adalimumab induces and maintains clinical remission in patients with moderate-to-severe ulcerative colitis. *Gastroenterology* 2012;**142**:257–65.
16. Colombel JF, Rutgeerts P, Reinisch W, Esser D, Wang Y, Lang Y, et al. Early mucosal healing with infliximab is associated with improved long-term clinical outcomes in ulcerative colitis. *Gastroenterology* 2011;**141**:1194–201.
17. Louis E, Mary JY, Vernier-Massouille G, Grimaud JC, Bouhnik Y, Laharie D, et al. Maintenance of remission among patients with Crohn's disease on anti-metabolite therapy after infliximab therapy is stopped. *Gastroenterology* 2012;**142**:63–70.
18. Daperno M, D'Haens G, Van Assche G, Baert F, Bulois P, Maunour V, et al. Development and validation of a new, simplified endoscopic activity score for Crohn's disease: the SES-CD. *Gastrointest Endosc* 2004;**60**:505–12.
19. Schroeder KW, Tremaine WJ, Ilstrup DM. Coated oral 5-aminosalicylic acid therapy for mildly to moderately active ulcerative colitis. *N Engl J Med* 1987;**317**:1625–9.
20. Moskovitz DN, Daperno M, Van Assche G, Baert F, Gavers A, Sostegni R, et al. Defining and validating cut-offs for the Simple Endoscopic Score for Crohn's Disease. *Gastroenterology* 2007;**132**:S1097.
21. D'Haens G, Sandborn WJ, Feagan BG, Geboes K, Hanauer SB, Irvine EJ, et al. A review of activity indices and efficacy end points for clinical trials of medical therapy in adults with ulcerative colitis. *Gastroenterology* 2007;**132**:763–86.
22. von Roon AC, Karamountzos L, Purkayastha S, Reese GE, Darzi AW, Teare JP, et al. Diagnostic precision of fecal calprotectin for inflammatory bowel disease and colorectal malignancy. *Am J Gastroenterol* 2007;**102**:803–13.
23. af Björkstén C-G, Nieminen U, Turunen U, Arkkila P, Sipponen T, Färkkilä M. Endoscopy at three months from start of anti-TNF as a predictor for long-term endoscopic remission in Crohn's disease. *J Crohns Colitis* 2012;**6**:S162.
24. Feagan BG, Panaccione R, Sandborn WJ, D'Haens GR, Schreiber S, Rutgeerts PJ, et al. Effects of adalimumab therapy on incidence of hospitalization and surgery in Crohn's disease: results from the CHARM study. *Gastroenterology* 2008;**135**:1493–9.
25. Lichtenstein GR, Yan S, Bala M, Hanauer S. Remission in patients with Crohn's disease is associated with improvement in employment and quality of life and a decrease in hospitalizations and surgeries. *Am J Gastroenterol* 2004;**99**:91–6.
26. Lichtenstein GR, Bala M, Han C, DeWoody K, Schaible T. Infliximab improves quality of life in patients with Crohn's disease. *Inflamm Bowel Dis* 2002;**8**:237–43.
27. Schnitzler F, Fidder H, Ferrante M, Noman M, Arijis I, Van Assche G, et al. Mucosal healing predicts long-term outcome of maintenance therapy with infliximab in Crohn's disease. *Inflamm Bowel Dis* 2009;**15**:1295–301.
28. Colombel JF, Rutgeerts P, Reinisch W, Mantzaris GJ, Kornbluth A, Rachmilewitz D, et al. Infliximab, azathioprine, or combination therapy for Crohn's disease. *N Engl J Med* 2010;**362**:1383–95.
29. Baert F, Moortgat L, van Assche G, Caenepeel P, Vergauwe P, De Vos M, et al. Mucosal healing predicts sustained clinical remission in patients with early-stage Crohn's disease. *Gastroenterology* 2010;**138**:463–8.
30. Mowat C, Cole A, Windsor A, Ahmad T, Arnott I, Driscoll R, et al. Guidelines for the management of inflammatory bowel disease in adults. *Gut* 2011;**60**:571–607.
31. Molazahi A, Steenholdt C, Ainsworth M, Brynskov J, Thomsen O, Seidelin J. Outcome after discontinuation of infliximab in patients with inflammatory bowel disease in clinical remission. *J Crohns Colitis* 2012;**6**:S111.
32. Clarke K, Requeiro M. Stopping immunomodulators and biologics in inflammatory bowel disease patients in remission. *Inflamm Bowel Dis* 2012;**18**:174–9.
